# Supplementary material
Source: PubMed Central journal article supplement (PMC4958166)
Supplement: AAC.00928-16_zac008165401so1.pdf [file AAC.00928-16_zac008165401so1.pdf]

# 1 Supplemental Material

## 2 MATERIALS AND METHODS

3 **Parasites and tissue culture maintenance** – We obtained *P. falciparum* strain 3D7 for growth in human  
4 erythrocytes from Walter and Eliza Hall Institute (Melbourne, Australia). We previously reported the *P. knowlesi*  
5 strain yH-1, adapted for growth in human erythrocytes (1), and the C9.1 line of *B. bovis* for growth in bovine  
6 erythrocytes (2). *B. divergens strain* Rouen 1987 for growth in human erythrocytes was a kind gift from Drs.  
7 Kirk Deitsch and Laura Kirkman (Weill Cornell Medical College). Human erythrocytes were purchased from  
8 Research Blood Components (Boston, USA) and cow erythrocytes from Lampire Biologicals Laboratories  
9 (Pipersville, USA). We maintained all parasite lines in standard hypoxic conditions [1% O<sub>2</sub>, 5% CO<sub>2</sub>, 94% N<sub>2</sub>;  
0 e.g. (3, 4)], typically at ~2%-hematocrit, in tissue culture media RPMI-1640 supplemented with 25 mM HEPES,  
1 50 mg/l hypoxanthine, 2.42 mM sodium bicarbonate, and 4.31 mg/ml AlbuMAX II (Invitrogen). Before addition  
2 of AlbuMAX-II and sodium bicarbonate, we adjusted the pH of the media to 6.75.

3 **The Malaria Box** – We obtained the Open Access Malaria Box antimalarial library (5), 5x 96 well plates with  
4 80 compounds per plate (>10 µl/well) at 10 mM in DMSO (rows A-H and columns 2-11), from the Medicine for  
5 Malaria Ventures (<http://www.mmv.org>) in October of 2012. We stored the library long-term at -80° C.

6 **The 3H-hypoxanthine uptake assay to measure parasite growth** – We performed the 3H-hypoxanthine  
7 uptake essentially as described elsewhere for *P. falciparum* (6, 7) with some modifications for the various  
8 parasite species tested here. All samples for measurement with or without drugs were prepared in 96-well flat  
9 bottom plates at 1 culture volume of 100 µl, 1%-hematocrit, and starting parasitemia of 1%, in RPMI-1640 as  
0 described above but with reduced hypoxanthine: 2.5 mg/l for *Plasmodium* spp. parasites and 0.1 mg/l for  
1 *Babesia* spp. parasites. We extensively washed synchronized ring-stage *Plasmodium* spp. parasites or  
2 asynchronous *Babesia* spp. parasites in hypoxanthine-free RPMI-1640 before resuspension in hypoxanthine-  
3 reduced media, and addition to concentrated compounds in 96-well flat bottom plates. We synchronized *P.*  
4 *falciparum* by treatment with sorbitol (5% w/v in deionized water) (8), and *P. knowlesi* by centrifugation through  
5 a Percoll gradient (60% in PBS) (9). For *P. falciparum*, we supplemented cultures after ~44-48 hrs in standard  
6 culture conditions, the duration of one blood-stage cell cycle in this species, with typically 1 (up to 1.5) µCi of  
7 3H-hypoxanthine monochloride at 0.2 culture volumes, prepared in RPMI-1640 without unlabeled  
8 hypoxanthine. We similarly added 1-2 µCi of 3H-hypoxanthine monochloride to *P. knowlesi* samples after ~24-

1 30 hrs, and 2  $\mu\text{Ci}$  to *Babesia* parasite species after ~24-30 hrs following initiation of inhibitor susceptibility  
2 assays. For all species, we froze cultures at  $-80^\circ\text{C}$  after an additional 24 hrs of incubation in standard culture  
3 conditions. Following thawing to lyse cells, we collected radioactive biomass on 96-well filter plates for  
4 quantification by liquid scintillation counting.

5 **Screening bioactive compounds in the Malaria Box in *Plasmodium* and *Babesia* spp. parasites** – We  
6 performed all automated liquid handling of the Malaria Box compounds with the assistance of the ICCB  
7 Longwood Screening Facility at the Harvard Medical School (Boston, USA). All dilutions of compounds were  
8 prepared in AlbuMAX II-free RPMI-1640 with reduced or no hypoxanthine. We ultimately plated inhibitors with  
9 parasites at positions on 96 well plates corresponding to the positions of inhibitors in the source Malaria Box  
0 plates. We added uninfected erythrocytes with media to Column 1 (negative controls for parasite growth), and  
1 parasite-infected erythrocytes to media without inhibitors in Column 12 (positive controls for parasite growth).  
2 During incubations at standard culture conditions, we kept an open dish with sterile water in the sealed  
3 modular incubator chamber with the assay plates to humidify the environment and prevent evaporation from  
4 samples. We performed all measurements of growth inhibition with 2-3 technical replicates.

5 Following thawing at room temperature and centrifugation, we used automated liquid handling to  
6 transfer 10  $\mu\text{l}$  of compound from the 96-well Malaria Box plates into 384 well-plates using the Vertical Pipetting  
7 Station (VPS) robot (Agilent). We began any other operations using the Malaria Box from compounds stored in  
8 these 384-well plates. For inhibitor-susceptibility assays with *Plasmodium* parasites, we used a custom SEIKO  
9 D-TRAN model XM3106-31PN robot fitted with a stainless steel pin array to take up compounds by surface  
0 tension from source plates and transfer into replicate assay plates. With this pinning procedure, a total of 400  
1 nl of each DMSO-dissolved compound was diluted into 200  $\mu\text{l}$  of AlbuMAX II-free RPMI-1640 media for a final  
2 compound concentration of 20  $\mu\text{M}$ . We used the VPS to serially dilute compounds by ten-fold (20  $\mu\text{l}$  compound  
3 with 180  $\mu\text{l}$  media) twice from the 20  $\mu\text{M}$  preparation. On a separate occasion, we prepared 6.32 and 0.632  $\mu\text{M}$   
4 compound by serial dilutions from 20  $\mu\text{M}$  compound. Following transfer of 25  $\mu\text{l}$  of 4x concentrated compound  
5 to 96 well assays plates with the VPS, we added *P. falciparum* or *P. knowlesi* parasites in RPMI-1640 with  
6 reduced hypoxanthine (1.33x with respect to Albumax and hematocrit) to initiate inhibitor-susceptibility assays  
7 as described above. We used the results of these assays at 5, 1.58, 0.5, 0.158, and 0.05  $\mu\text{M}$  compound to

1 assess the IC50 values for inhibition of *Plasmodium* spp. parasites. For *P. falciparum*, the 5 µM data point was  
2 averaged with an additional biological replicate measurement.

3 For *Babesia* spp., we used the VPS to pipette and dilute 1 µl of compound from the 384-well plates  
4 containing the Malaria Box compounds into 200 µl media in 96 well plates for a final concentration of 50 µM.  
5 We thereafter used the VPS to serially dilute the compound by 5-fold (40 µl compound to 160 µl media) thrice.  
6 After transfer of 50 µl of 2x compound to 96 well plates with the VPS, we added *B. bovis* or *B. divergens* in  
7 RPMI-1640 with reduced hypoxanthine (2x with respect to Albumax and hematocrit) to initiate inhibitor  
8 susceptibility assays. We used the results of these assays at 25, 5, 1, and 0.2 µM compound, to assess the  
9 IC50 values for inhibition of *Babesia* spp. parasites. For *B. divergens*, inhibition at 5 µM is an average value  
0 with two other biological replicate measurements, in which compound was prepared through pinning as  
1 described for the *Plasmodium* spp. parasites. For *B. bovis*, inhibition at 5 µM is derived wholly from two distinct  
2 biological replicate measurements prepared through pinning. We stored diluted compounds in hypoxic  
3 conditions at 4° C for addition to parasites typically the same day, but no more than two days later.

4 **Determination of inhibitory concentrations for Malaria Box inhibitors** – We quantified inhibition by  
5 compounds with the 3H-scintillation counts used to assess parasite growth. To control for plate-to-plate  
6 variability, for each assay plate we considered 100% parasite growth as the average value of the 8 no-drug  
7 measurements in column 12, and zero growth as background 3H-scintillation associated with the average  
8 value of the 8 uninfected erythrocyte sample measurements in column 1. Percent inhibition by each compound  
9 on each plate was calculated accordingly. For further analysis, we calculated the average percent inhibition  
0 values across technical replicate measurements from different plates. For IC50 determination for each Malaria  
1 Box compound, we used non-linear regression analysis in the software Prism (Graphpad), fitting our dose-  
2 response data to the equation, % Inhibition =  $100\% / [1 + 10^{(\text{LogIC}_{50} - X) \cdot \text{HillSlope}}]$ , where X is the log10-transform of  
3 the inhibitor concentration. For all datasets, we manually inspected the resulting data to assess confidence in  
4 the IC50 values. Criteria which raised confidence included clear dose-dependent inhibition of parasite growth  
5 with at least ~40% inhibition at the highest concentration, reproducibility between technical replicates and  
6 biological replicates, and goodness of fit ( $R^2$ ). We assigned an IC50 value equal to the lowest concentrations  
7 tested, 0.05 µM for the *Plasmodium* species and 0.2 µM for the *Babesia* species, for strongly inhibitory  
8 compounds that blocked growth by more than 50% over all tested doses. Only Malaria Box compounds that we

1 found to be active in *P. falciparum* were considered for analysis in the other parasite species. We performed all  
2 other statistical analyses, including Pearson correlation, Spearman correlation, and linear regression, in Prism  
3 software. For Spearman correlations between any of the parasite species, all compounds that we found to  
4 inhibit *P. falciparum* blood-stage proliferation were considered for analyses.

5 **Parasite susceptibility to re-purchased compounds** – We purchased compounds MMV667491 (Cat. No.  
6 STK586450), MMV019266 (Cat. No. STK845176), MMV396693 (Cat. No. STL036739), MMV085203 (Cat.  
7 No. STK565927), and MMV019690 (Cat. No. STK003728) from VitaScreen, LLC (Urbana-Champaign, USA);  
8 compounds MMV666022 (Cat. No. 6412712), MMV665814 (Cat. No. 7014447), and MMV665943 (Cat. No.  
9 7609381) from ChemBridge Corp. (San Diego, USA); and imidocarb/MMV665810 (Cat. No. I387550) from  
0 Toronto Research Chemicals, Inc. (Toronto, Canada). We generated chemical structures in Table 1 with  
1 PubChem Sketcher v2.4 (<https://pubchem.ncbi.nlm.nih.gov/edit2/index.html>), with input of the SMILES strings  
2 from the original publication of the Malaria Box (5), or from the PubChem database from the National Center  
3 for Biotechnology Information. Except for imidocarb and atovaquone, which we prepared at 50 and 1 mM in  
4 DMSO, respectively, we prepared all concentrated stocks of inhibitors at 10 mM in DMSO. For confirmation of  
5 susceptibility of parasites to inhibitors (Table 1), we measured parasite growth by 3H-hypoxanthine uptake  
6 (see above) over 8 serially-diluted concentrations with a high concentration of 25  $\mu$ M. We prepared 2x stocks  
7 of all test concentrations, designed to capture the full dose-response, in reduced hypoxanthine RPMI-1640.  
8 We assessed inhibitory concentration values from resulting dose-response data, as described above.

9

1 SUPPLEMENTAL REFERENCES

2

3 1. **Lim C, Hansen E, Desimone TM, Moreno Y, Junker K, Bei A, Brugnara C, Buckee CO, Duraisingh**  
4 **MT.** 2013. Expansion of host cellular niche can drive adaptation of a zoonotic malaria parasite to humans.  
5 *Nature Communications* **4**:1638.

6 2. **Allred DR, Cinque RM, Lane TJ, Ahrens KP.** 1994. Antigenic variation of parasite-derived antigens on  
7 the surface of *Babesia bovis*-infected erythrocytes. *Infection and Immunity* **62**:91–98.

8 3. **Trager W, Jensen JB.** 1976. Human malaria parasites in continuous culture. *Science* **193**:673–675.

9 4. **Levy M, Ristic M.** 1980. *Babesia bovis*: continuous cultivation in a microaerophilous stationary phase  
0 culture. *Science* **207**:1218–1220.

1 5. **Spangenberg T, Burrows JN, Kowalczyk P, McDonald S, Wells TNC, Willis P.** 2013. The Open  
2 Access Malaria Box: A Drug Discovery Catalyst for Neglected Diseases. *PLoS ONE* **8**:e62906.

3 6. **Fidock DA, Nomura T, Wellems TE.** 1998. Cycloguanil and Its Parent Compound Proguanil  
4 Demonstrate Distinct Activities against *Plasmodium falciparum* Malaria Parasites Transformed with Human  
5 Dihydrofolate Reductase. *Molecular Pharmacology* **54**:1140–1147.

6 7. **Paul AS, Saha S, Engelberg K, Jiang RHY, Coleman BI, Kosber AL, Chen C-T, Ganter M, Espy N,**  
7 **Gilberger T-W, Gubbels M-J, Duraisingh MT.** 2015. Parasite Calcineurin Regulates Host Cell  
8 Recognition and Attachment by Apicomplexans. *Cell Host Microbe* **18**:49–60.

9 8. **Lambros C, Vanderberg JP.** 1979. Synchronization of *Plasmodium falciparum* erythrocytic stages in  
0 culture. *J Parasitol* **65**:418–420.

1 9. **Fernandez V, Treutiger CJ, Nash GB, Wahlgren M.** 2000. Multiple Adhesive Phenotypes Linked to  
2 Rosetting Binding of Erythrocytes in *Plasmodium falciparum* Malaria. *Infection and Immunity* **68**:2391–  
3 2391.

4

5

1 SUPPLEMENTAL FIGURE

2 FIG S1: *Reproducibility of chemical inhibition of growth in the Babesia species.*

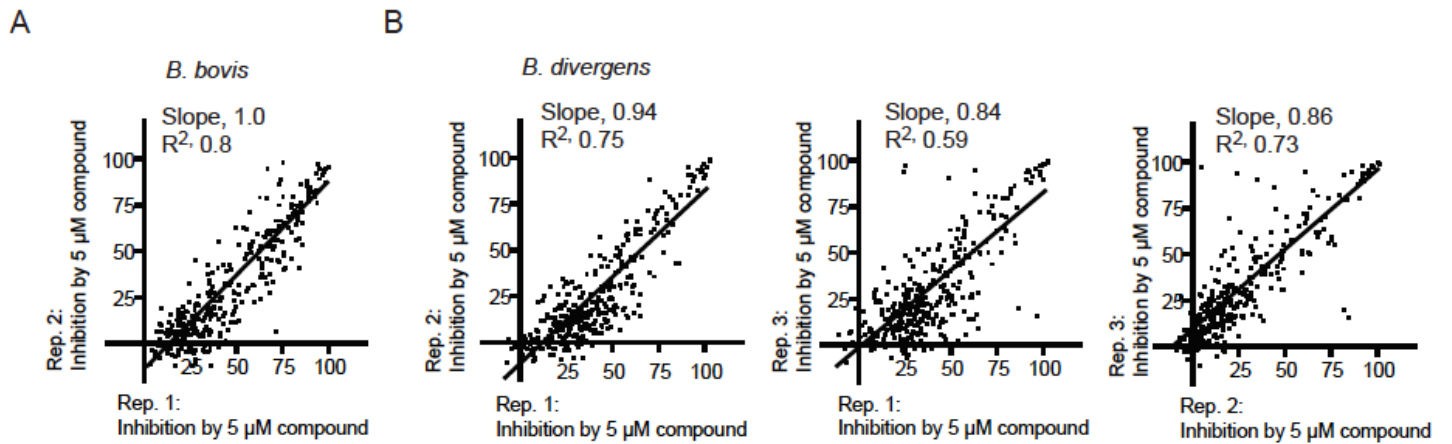

3

4 Scatter plots comparing absolute levels of growth inhibition between biological replicates of (A) *B. bovis*, or (B)

5 *B. divergens* by the Malaria Box compounds. Each data point reports the activity of a single compound dosed

6 at 5  $\mu$ M (n=328 inhibitors active in *P. falciparum*, Figure 1B). For linear regression of each plot, we show the

7 best-fit line with its slope and R<sup>2</sup> value.
